# Supplementary material for: miR-9 and miR-181a Target Gab2 to Inhibit the Proliferation and Migration of Hepatocellular Carcinoma HepG2 Cells
Source: MDPI journal article supplement (doi:10.3390/genes13112152), 2022-11-18
Supplement: s1 [file s1]

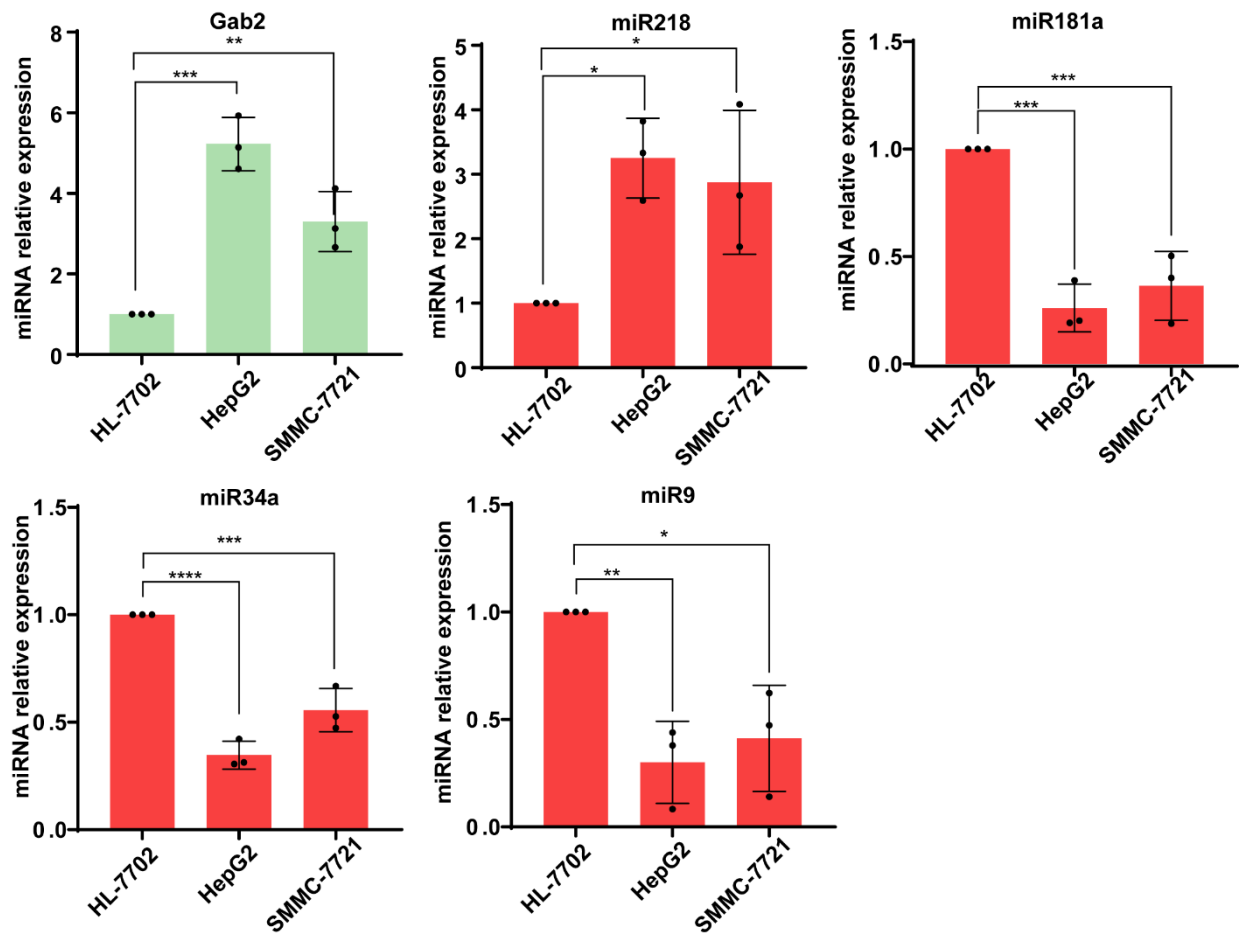

Supplemental Figure S2. Expression of miRNAs in normal liver cell HL-7702 and hepatocellular carcinoma cell line HepG2 and SMMC-7721. The results are presented as mean  $\pm$  SD. Statistical comparisons of values were made using Student's t-test. ns, no significance; \*  $p < 0.05$ , \*\*  $p < 0.01$ , \*\*\*  $p < 0.001$ .
