# Supplementary material for: miR-9 and miR-181a Target Gab2 to Inhibit the Proliferation and Migration of Hepatocellular Carcinoma HepG2 Cells
Source: MDPI journal article supplement (doi:10.3390/genes13112152), 2022-11-18
Supplement: s1 [file s1]

**A**

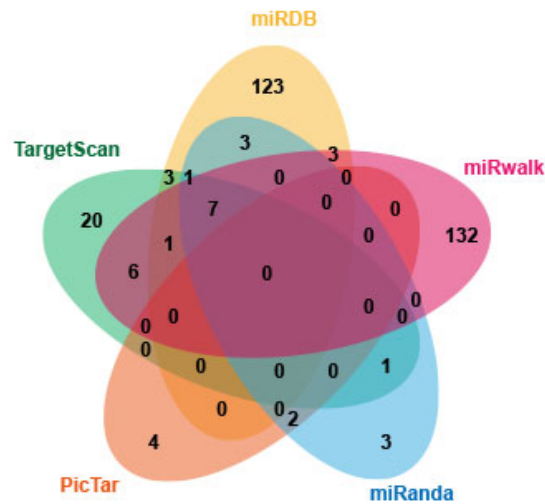

**B**

| Name            | P value | Fold Change |
|-----------------|---------|-------------|
| hsa-let-7a      | <0.001  | -4.93       |
| hsa-let-7b      | <0.01   | -4.2        |
| hsa-let-7c      | <0.05   | -3.37       |
| hsa-let-7d      | <0.05   | -3.48       |
| hsa-let-7f-2    | <0.01   | -3.58       |
| hsa-miR-101d    | <0.05   | -3.75       |
| hsa-miR-107     | <0.05   | -3.92       |
| hsa-miR-10a     | <0.05   | -1.94       |
| hsa-miR-10b     | <0.05   | -2.49       |
| hsa-miR-125a-3p | <0.01   | -3.79       |
| hsa-miR-125b    | <0.05   | -2.15       |
| hsa-miR-132*    | <0.05   | -1.74       |
| hsa-miR-133b    | <0.05   | -4.05       |
| hsa-miR-134     | <0.01   | -3.02       |
| hsa-miR-135a    | <0.01   | -4.98       |
| hsa-miR-139-3p  | <0.01   | -3.03       |
| hsa-miR-145     | <0.05   | -2.47       |
| hsa-miR-150*    | <0.01   | -1.86       |
| hsa-miR-16-1    | <0.05   | -3.5        |
| hsa-miR-181a    | <0.05   | -2.41       |
| hsa-miR-181a-2  | <0.05   | -2.77       |
| hsa-miR-181c    | <0.01   | -4.27       |
| hsa-miR-188-5p  | <0.01   | -4.67       |

  

| Name           | P value |
|----------------|---------|
| hsa-miR-28-3p* | <0.05   |
| hsa-miR-296-5p | <0.01   |
| hsa-miR-299-5p | <0.05   |
| hsa-miR-30a    | <0.05   |
| hsa-miR-320    | <0.05   |
| hsa-miR-323-3p | <0.05   |
| hsa-miR-324-3p | <0.05   |
| hsa-miR-324-5p | <0.05   |
| hsa-miR-328    | <0.01   |
| hsa-miR-330-3p | <0.01   |
| hsa-miR-331-3p | <0.01   |
| hsa-miR-337-3p | <0.01   |
| hsa-miR-337-5p | <0.05   |
| hsa-miR-339-3p | <0.05   |
| hsa-miR-339-5p | <0.05   |
| hsa-miR-33a    | <0.05   |
| hsa-miR-345    | <0.05   |
| hsa-miR-361-5p | <0.05   |
| hsa-miR-374a   | <0.01   |
| hsa-miR-9      | <0.05   |
| hsa-miR-423-5p | <0.01   |
| hsa-miR-432    | <0.01   |
| hsa-miR-433*   | <0.05   |
| hsa-miR-483-5p | <0.05   |

**Supplemental Figure S1. Prediction of GAB2-targeting miRNAs.** (A) Prediction of GAB2-targeting miRNAs by five bioinformatics websites. (B) the abnormally expressed miRNAs in fatty liver and hepatocellular carcinoma.
