# Supplementary material for: miR-9 and miR-181a Target Gab2 to Inhibit the Proliferation and Migration of Hepatocellular Carcinoma HepG2 Cells
Source: MDPI journal article supplement (doi:10.3390/genes13112152), 2022-11-18
Supplement: s1 [file s1]

**The primer for Gab2 mRNA:**

Forward primer: CCCTGTGTCAAACCACATGC

Reverse primer: CTGCTCTTCGGCTTATGCACT

**The mimic and inhibitors of miRNA:**

miR-9-5p mimic 5-UCUUUGGUUAUCUAGCUGUAUGA-3

3-AGAAACCAAUAGAUCGACAUACU-5

inhibitor 5-UCAUACAGCUAGAUAAACCAAAGA-3

miR-34a-5p mimic: 5-UGGCAGUGUCUUAGCUGGUUGU-3

3-ACCGUCACAGAAUCGACCAACA-5

Inhibitor: 5-ACAACCAGCUAAGACACUGCCA-3

miR-181a-5p mimic: 5-AACAUUCAACGCUGUCGGUGAGU-3

3-UUGUAAGUUGCGACAGCCACUCA-5

Inhibitor: 5-ACUCACCGACAGCGUUGAAUGUU-3

miR-181c-5p mimic: 5-AACAUUCAACCUGUCGGUGAGU-3

3-UUGUAAGUUGCACAGCCACUCA-5

Inhibitor: 5-ACUCACCGACACGUUGAAUGUU-3

**The primers of miRNA-Gab2 3'UTR binding reporter-luciferase constructs:**

miR-181a-Forward primer:AGCTTTGTTTAAACGGACCGTTCCTAGGATGG

miR-181a-Reverse primer:GCTCTAGAAATGCTAGGAGGAGAGGTGCAGCT

miR-9-Forward primer:CTAGCTAGCTCGGGGCCCAGCTGTGATTTTT

miR-9-Reverse primer:ACGCGTCGACACAGTGTCTTGTTCATCTCCA

**The mutation primers were designed as follows:**

miR-181-a-Fm: GGGTGGGGGATCCACCCACCTTTATGTTGACTGTT

miR-181-a-Rm: AACAGTCAACATAAAGGTGGGTGGATCCCCACCC

miR-9-Fm: AGGGAGGAGCGGATCCTCACGTTGCCTTGGATAAT

miR-9-Rm: ATTATCCAAGGCAACGTGAGGATCCGCTCCTCCCT
